# Supplementary material
Source: PubMed Central journal article supplement (PMC2583284)
Supplement: M806061200_2.pdf [file M806061200_2.pdf]

## Supplementary experimental procedures

Following primer sets were used for quantitative PCR:

| Name              | Forward primer               | Reverse primer                 |
|-------------------|------------------------------|--------------------------------|
| mmBrg1_mRNA       | ATCAACGGGCCTTTCCTCAT         | GCCCAGTTTGACAGTGTGCGA          |
| mmBrm_mRNA        | GGTTTAATGCTCCATTTGCCA        | TCTTCGTTCCAGGTCCACCCTT         |
| mmSMARCB1-mRNA    | AGTACAAGGCTGTGTCCATCAGC      | CTGCTCCCTGAGGTAGGTGCG          |
| mmSMARCC1-mRNA    | TGAAAGATATCATCAAACGGCATC     | TTTGACTTCTCATCAGTAAATGTCCC     |
| mmSMARCC2-mRNA    | CCCACTCCTGAGAAACCGAG         | GGTGTGCGAGGATCCACTTCG          |
| mmSMARCF1-mRNA    | TCCTGACCCAGTCATCCAGTC        | GAGGTCTCATCTTTCCCATCTGAT       |
| mmARID1B-mRNA     | GCAACCAATCGAGGTCTGGT         | TGGCTACCTGGAATACTCGCA          |
| mm.34431_mRNA     | ACGGACTGTGCAAAGTGTCTGA       | AGACACCACAGGCTCCAGGTA          |
| mmCRABP1_mRNA     | GGACGCAAATGCAGGAGTTT         | TGTTCTCATTCTCCCACGTGG          |
| mmTRH_mRNA        | TCTGCAGAGTCTCCACCTTGC        | GGTCCCTGCATCTTGGAGTCT          |
| mmNUPR1_mRNA      | TGAGACGGAGCTGGAGATAAAG       | GGTGTGGTGTCTGTGGTCTGG          |
| mmENG_mRNA        | GATCTTGACCACAGGTGAATACTCC    | ACCTTGCTTCCTGGAAAGATCTT        |
| mmIA-1_mRNA       | CTAGTATTCGCTGTGTTTCATGGTCTAG | TTGGTAGGCAGAGCAAACCG           |
| mmNodal_mRNA      | ATCATCCGCAGCCTCCAG           | TCCGGTCACGTCCACATCTT           |
| mmRNF128_mRNA     | CGAAATGCAAGAGCTCAAAGC        | AGCATCTGCCTTTAACTGCCTC         |
| mmBmi1_mRNA       | TCACAAAACCAGACCACTCCTG       | TCTTGAAGAGTTTTATCTGACCTTATGTTT |
| mmADAMTS1_mRNA    | AGTGCCTACATGGTCACGTCC        | ATCAAACATTCCTCCGTGTC           |
| mmTHBS1_mRNA      | GCACCATCGTGACCACTCTG         | TTCTCTTCCGTCACTTTTTCGG         |
| mmDUB1_mRNA       | CCTTCCCAGAAGCAGATCCA         | ACCACCTGAGCTTCATCCTGAT         |
| mmTRH-5kb_gen     | GATCCCCTAGAATTGGAGTTAGTGATT  | TTCTTATTAGCCACATGGTGAATTAT     |
| mmTRH-2kb_gen     | GAACCTGGGTGCTAGGAGCC         | AAGCGACCCAGACCAAAGCT           |
| mmTRH-1kb_gen     | ACATGGGTA ACTCAAAGGCAGC      | CAGGGTACTTCCTAGTGACGTAGCT      |
| mmTRH-INR_gen     | TCTCCCTCCCTTTGTTCCCTAG       | TCCGGAGGTCTATTGACTAAGAGAA      |
| mmTRH+1kb_gen     | CACCAGTCAGTGCCCCTGTT         | AAGGTTATACGCTTCTTAAATCTGGAAC   |
| mmTRH+2kb_gen     | AGGTTAGAGTCAGGCTTTAGGTCTAGG  | GGATACACAGGGCTTACATCAGC        |
| mmADAMTS1-5kb_gen | GTCCGGTACAGGGCCTTACA         | AGATCGGAGGTATCCCCCAG           |
| mmADAMTS-2kb_gen  | ATGCTTCTCAAATAAAGTGGGTCG     | AACCTGATT CACAAGTGGGCTT        |
| mmADAMTS1-1kb_gen | AGAACGCAGACTAGAAGGGAGTTG     | AAAAGGGATTTCTGCTTTCTCTTCTT     |
| mmADAMTS1-INR_gen | CTGGTCCTTGCACTCGCTAGA        | CTTGCGATAGCACCTAGCTCG          |
| mmADAMTS+1.0_gen  | AAGTGCGGCGTCATGGAC           | GAGTCGCTGGTTGGCAGG             |
| mmADAMTS+2kb_gen  | TGACCGCTGAGTCTCAGCAG         | GGTTGCCAATTTGGAAAAT GG         |
| mmNdl-INR_gen     | AAGGGACCCTGGTGTGTTGTTG       | AAGAAGGATGCGGAGGCTGT           |
| mmCRABP1-INR_gen  | TAAAACAGAATGTGGGCGGC         | TTGGAACTTGCTCTCCCCTG           |
